# Supplementary material
Source: MDPI journal article supplement (https://www.mdpi.com/2073-4441/13/6/812)
Supplement: s1 [file s1]

## Supplementary material

**Table S1.** Information for the 142 maritime routes of the ship. For each route, the date, the ports of departure and destination (path), as well as from how many base stations it has been solved using the D-GNSS method (base) and whether it has been solved by the PPP method.

| Day      | Path     | Data  | Base st. | PPP | Day      | Path     | Data      | Base st. | PPP |
|----------|----------|-------|----------|-----|----------|----------|-----------|----------|-----|
| 30       |          |       |          |     |          |          |           |          |     |
| January  | Pat-Brin | valid | all      | yes | 11 April | Brin-Pat | corrupted | none     | yes |
| 31       |          |       |          |     |          |          |           |          |     |
| January  | Brin-Pat | valid | all      | yes | 12 April | Pat-Brin | corrupted | none     | yes |
| 1        |          |       |          |     |          |          |           |          |     |
| February | Pat-Brin | valid | all      | yes | 13 April | Brin-Pat | corrupted | none     | yes |
| 2        |          |       |          |     |          |          |           |          |     |
| February | Brin-Pat | valid | all      | yes | 14 April | Pat-Brin | corrupted | none     | yes |
| 3        |          |       |          |     |          |          |           |          |     |
| February | Pat-Brin | valid | all      | yes | 15 April | Brin-Pat | corrupted | none     | yes |
| 4        |          |       |          |     |          |          |           |          |     |
| February | Brin-Pat | valid | all      | yes | 16 April | Pat-Brin | corrupted | none     | yes |
| 5        |          |       |          |     |          |          |           |          |     |
| February | Pat-Brin | valid | all      | yes | 17 April | Brin-Pat | corrupted | none     | yes |
| 6        |          |       |          |     |          |          |           |          |     |
| February | Brin-Pat | valid | all      | yes | 18 April | Pat-Brin | corrupted | none     | yes |
| 7        |          |       |          |     |          |          |           |          |     |
| February | Pat-Brin | valid | all      | yes | 19 April | Brin-Pat | corrupted | none     | yes |
| 8        |          |       |          |     |          |          |           |          |     |
| February | Brin-Pat | valid | all      | yes | 20 April | Pat-Brin | corrupted | none     | yes |
| 9        |          |       |          |     |          |          |           |          |     |
| February | Pat-Brin | valid | all      | yes | 21 April | Brin-Pat | corrupted | none     | yes |
| 10       |          |       |          |     |          |          |           |          |     |
| February | Brin-Pat | valid | all      | yes | 22 April | Pat-Brin | valid     | all      | yes |
| 11       |          |       |          |     |          |          |           |          |     |
| February | Pat-Brin | valid | all      | yes | 23 April | Brin-Pat | valid     | all      | yes |
| 12       |          |       |          |     |          |          |           |          |     |
| February | Brin-Pat | valid | all      | yes | 24 April | Pat-Brin | valid     | all      | yes |
| 13-Feb-  |          |       | all ex.  |     |          |          |           |          |     |
| 15       | Pat-Brin | valid | LECC     | yes | 25 April | Brin-Pat | valid     | all      | yes |
| 14       |          |       | all ex.  |     |          |          |           |          |     |
| February | Brin-Pat | valid | LECC     | yes | 26 April | Pat-Brin | valid     | all      | yes |
| 15       |          |       | all ex.  |     |          |          |           |          |     |
| February | Pat-Brin | valid | LECC     | yes | 27 April | Brin-Pat | valid     | all      | yes |
| 16       |          |       | all ex.  |     |          |          |           |          |     |
| February | Brin-Pat | valid | LECC     | yes | 28 April | Pat-Brin | valid     | all      | yes |
| 17       |          |       | all ex.  |     |          |          |           |          |     |
| February | Pat-Brin | valid | LECC     | yes | 29 April | Brin-Pat | valid     | all      | yes |
| 18       |          |       | all ex.  |     |          |          |           |          |     |
| February | Brin-Pat | valid | LECC     | yes | 30 April | Pat-Brin | valid     | all      | yes |
| 19       |          |       | all ex.  |     |          |          |           |          |     |
| February | Pat-Brin | valid | LECC     | yes | 1 May    | Brin-Pat | valid     | all      | yes |
| 20       |          |       |          |     |          |          |           |          |     |
| February | Brin-Pat | valid | all      | yes | 2 May    | Pat-Brin | valid     | all      | yes |
| 21-Feb-  |          |       |          |     |          |          |           |          |     |
| 15       | Pat-Brin | valid | all      | yes | 3 May    | Brin-Pat | valid     | all      | yes |
| 22       |          |       |          |     |          |          |           |          |     |
| February | Brin-Pat | valid | all      | yes | 4 May    | Pat-Brin | valid     | all      | yes |



|          |          |           |      |     |         |          |           |      |     |
|----------|----------|-----------|------|-----|---------|----------|-----------|------|-----|
| 23       |          |           |      |     |         |          |           |      |     |
| February | Pat-Brin | valid     | all  | yes | 5 May   | Brin-Pat | valid     | all  | yes |
| 24       |          |           |      |     |         |          |           |      |     |
| February | Brin-Pat | valid     | all  | yes | 6 May   | Pat-Brin | valid     | all  | yes |
| 25       |          |           |      |     |         |          |           |      |     |
| February | Pat-Brin | valid     | all  | yes | 7 May   | Brin-Pat | valid     | all  | yes |
| 26       |          |           |      |     |         |          |           |      |     |
| February | Brin-Pat | valid     | all  | yes | 8 May   | Pat-Brin | valid     | all  | yes |
| 27       |          |           |      |     |         |          |           |      |     |
| February | Pat-Brin | valid     | all  | yes | 9 May   | Brin-Pat | valid     | all  | yes |
| 28       |          |           |      |     |         |          |           |      |     |
| February | Brin-Pat | valid     | all  | yes | 10 May  | Pat-Brin | valid     | all  | yes |
| 1 March  | Pat-Brin | valid     | all  | yes | 11 May  | Brin-Pat | valid     | all  | yes |
| 2 March  | Brin-Pat | valid     | all  | yes | 12 May  | Pat-Brin | valid     | all  | yes |
| 3 March  | Pat-Brin | valid     | all  | yes | 13 May  | Brin-Pat | valid     | all  | yes |
| 4 March  | Brin-Pat | valid     | all  | yes | 14 May  | Pat-Brin | valid     | all  | yes |
| 5 March  | Pat-Brin | valid     | all  | yes | 15 May  | Brin-Pat | valid     | all  | yes |
| 6 March  | Brin-Pat | valid     | all  | yes | 16 May  | Pat-Brin | valid     | all  | yes |
| 7 March  | Pat-Brin | valid     | all  | yes | 17 May  | Brin-Pat | valid     | all  | yes |
| 8 March  | Brin-Pat | valid     | all  | yes | 18 May  | Pat-Brin | valid     | all  | yes |
| 9 March  | Pat-Brin | valid     | all  | yes | 19 May  | Brin-Pat | valid     | all  | yes |
| 10 March | Brin-Pat | valid     | all  | yes | 20 May  | Pat-Brin | valid     | all  | yes |
| 11 March | Pat-Brin | valid     | all  | yes | 21 May  | Brin-Pat | valid     | all  | yes |
| 12 March | Brin-Pat | valid     | all  | yes | 22 May  | Pat-Brin | corrupted | none | yes |
| 13 March | Pat-Brin | valid     | all  | yes | 23 May  | Brin-Pat | valid     | all  | yes |
| 14 March | Brin-Pat | valid     | all  | yes | 24 May  | Pat-Brin | valid     | all  | yes |
| 15 March | Pat-Brin | valid     | all  | yes | 25 May  | Brin-Pat | valid     | all  | yes |
| 16 March | Brin-Pat | valid     | all  | yes | 26 May  | Pat-Brin | valid     | all  | yes |
| 17 March | Pat-Brin | valid     | all  | yes | 27 May  | Brin-Pat | valid     | all  | yes |
| 18 March | Brin-Pat | valid     | all  | yes | 28 May  | Pat-Brin | valid     | all  | yes |
| 19 March | Pat-Brin | valid     | all  | yes | 29 May  | Brin-Pat | valid     | all  | yes |
| 20 March | Brin-Pat | valid     | all  | yes | 30 May  | Pat-Brin | valid     | all  | yes |
| 21 March | Pat-Brin | valid     | all  | yes | 31 May  | Brin-Pat | valid     | all  | yes |
| 22 March | Brin-Pat | corrupted | none | yes | 1 June  | Pat-Brin | valid     | all  | yes |
| 23 March | Pat-Brin | corrupted | none | yes | 2 June  | Brin-Pat | valid     | all  | yes |
| 24 March | Brin-Pat | corrupted | none | yes | 3 June  | Pat-Brin | valid     | all  | yes |
| 25 March | Pat-Brin | corrupted | none | yes | 4 June  | Brin-Pat | valid     | all  | yes |
| 26 March | Brin-Pat | corrupted | none | yes | 5 June  | Pat-Brin | valid     | all  | yes |
| 27 March | Pat-Brin | corrupted | none | yes | 6 June  | Brin-Pat | valid     | all  | yes |
| 28 March | Brin-Pat | corrupted | none | yes | 7 June  | Pat-Brin | valid     | all  | yes |
| 29 March | Pat-Brin | corrupted | none | yes | 8 June  | Brin-Pat | valid     | all  | yes |
| 30 March | Brin-Pat | corrupted | none | yes | 9 June  | Pat-Brin | valid     | all  | yes |
| 31 March | Pat-Brin | corrupted | none | yes | 10 June | Brin-Pat | valid     | all  | yes |
| 1 April  | Brin-Pat | corrupted | none | yes | 11 June | Pat-Brin | valid     | all  | yes |
| 2 April  | Pat-Brin | corrupted | none | yes | 12 June | Brin-Pat | valid     | all  | yes |
| 3 April  | Brin-Pat | corrupted | none | yes | 13 June | Pat-Brin | valid     | all  | yes |
| 4 April  | Pat-Brin | corrupted | none | yes | 14 June | Brin-Pat | valid     | all  | yes |
| 5 April  | Brin-Pat | corrupted | none | yes | 15 June | Pat-Brin | valid     | all  | yes |



|          |          |           |      |     |         |          |       |     |     |
|----------|----------|-----------|------|-----|---------|----------|-------|-----|-----|
| 6-Apr-15 | Pat-Brin | corrupted | none | yes | 16 June | Brin-Pat | valid | all | yes |
| 7 April  | Brin-Pat | corrupted | none | yes | 17 June | Pat-Brin | valid | all | yes |
| 8 April  | Pat-Brin | corrupted | none | yes | 18 June | Brin-Pat | valid | all | yes |
| 9 April  | Brin-Pat | corrupted | none | yes | 19 June | Pat-Brin | valid | all | yes |
| 10 April | Pat-Brin | corrupted | none | yes | 20 June | Brin-Pat | valid | all | yes |

**Table S2.** Indicative data from the ship's draughts at the points of the calculation (A and B) for the period from 30 January to 6 February and the correction of the Hs of the geometric altitude according to Figure 7.

| Day        | Port        | h <sub>A</sub> (cm) | h <sub>B</sub> (cm) | h <sub>s</sub> (cm) |
|------------|-------------|---------------------|---------------------|---------------------|
| 30 January | Patra       | 143                 | 122                 | 127.25              |
| 30 January | Igoumenitsa | 149                 | 133                 | 137                 |
| 31 January | Brindisi    | 124                 | 117                 | 118.75              |
| 31 January | Igoumenitsa | 132                 | 128                 | 129                 |
| 1 February | Patra       | 139                 | 128                 | 130.75              |
| 1 February | Igoumenitsa | 140                 | 132                 | 134                 |
| 2 February | Brindisi    | 105                 | 98                  | 99.75               |
| 2 February | Igoumenitsa | 99                  | 95                  | 96                  |
| 3 February | Patra       | 132                 | 121                 | 123.75              |
| 3 February | Igoumenitsa | 144                 | 122                 | 127.5               |
| 4 February | Brindisi    | 121                 | 118                 | 118.75              |
| 4 February | Igoumenitsa | 97                  | 97                  | 97                  |
| 5 February | Patra       | 113                 | 105                 | 107                 |
| 5 February | Igoumenitsa | 120                 | 117                 | 117.75              |
| 6 February | Brindisi    | 111                 | 104                 | 105.75              |
| 6 February | Igoumenitsa | 119                 | 111                 | 113                 |

**Table S3.** Extract from the total table with the calculated values at the ports of Patras and Brindisi.

| Harbor ellipsoid height in m (static solution - PPP) |       |             |          |
|------------------------------------------------------|-------|-------------|----------|
| Day                                                  | Patra | Day         | Brindisi |
| 30 January                                           | 27.18 | 31 January  | 40.88    |
| 1 February                                           | 27.62 | 2 February  | 41.32    |
| 3 February                                           | 27.79 | 4 February  | 41.49    |
| 5 February                                           | 27.18 | 6 February  | 40.88    |
| 7 February                                           | 26.96 | 8 February  | 40.66    |
| 9 February                                           | 27.22 | 10 February | 40.92    |
| 11 February                                          | 27.50 | 12 February | 41.20    |
| 13 February                                          | 26.90 | 14 February | 40.60    |
| 15 February                                          | 27.26 | 16 February | 40.96    |
| 17 February                                          | 27.74 | 18 February | 41.44    |
| 19 February                                          | 26.71 | 20 February | 40.41    |
| 21 February                                          | 27.71 | 22 February | 41.41    |
| 23 February                                          | 26.96 | 24 February | 40.66    |
| 25 February                                          | 27.18 | 26 February | 40.88    |
| 27 February                                          | 27.14 | 28 February | 40.84    |
| 1 March                                              | 26.36 | 2 March     | 40.06    |
| 3 March                                              | 27.31 | 4 March     | 41.01    |
| 5 March                                              | 27.40 | 6 March     | 41.10    |
| 7 March                                              | 27.21 | 8 March     | 40.91    |
| 9 March                                              | 27.31 | 10 March    | 41.01    |
| 11 March                                             | 27.22 | 12 March    | 40.92    |
| 13 March                                             | 26.87 | 14 March    | 40.57    |
| 15 March                                             | 27.40 | 16 March    | 41.10    |
| 17 March                                             | 27.55 | 18 March    | 41.25    |



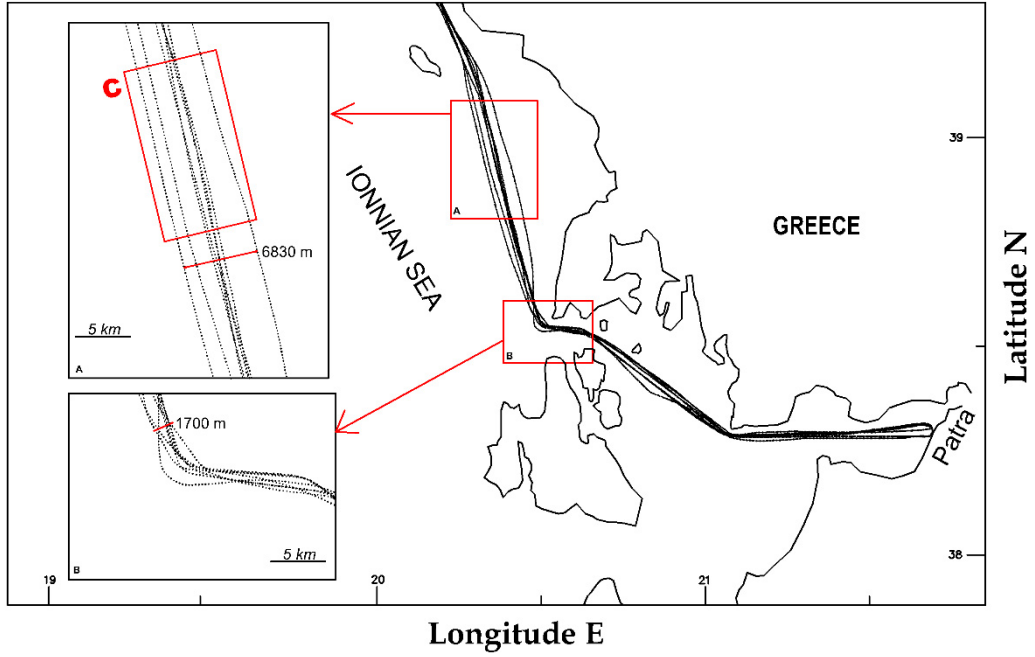

**Figure S1.** Map depicting the multiple paths of our records. We focus on two areas A and B, where we observe different spreading of the routes. In area A, where we have open sea and the ship is not required to maneuver, we have differences in the order of even 7km, while in the relatively closed area B, the distances are much smaller (1.700m). The 8 paths (11/2-19/2) shown in the figure are consecutive and are reported in codes ID 13-21 (see Table SM1).

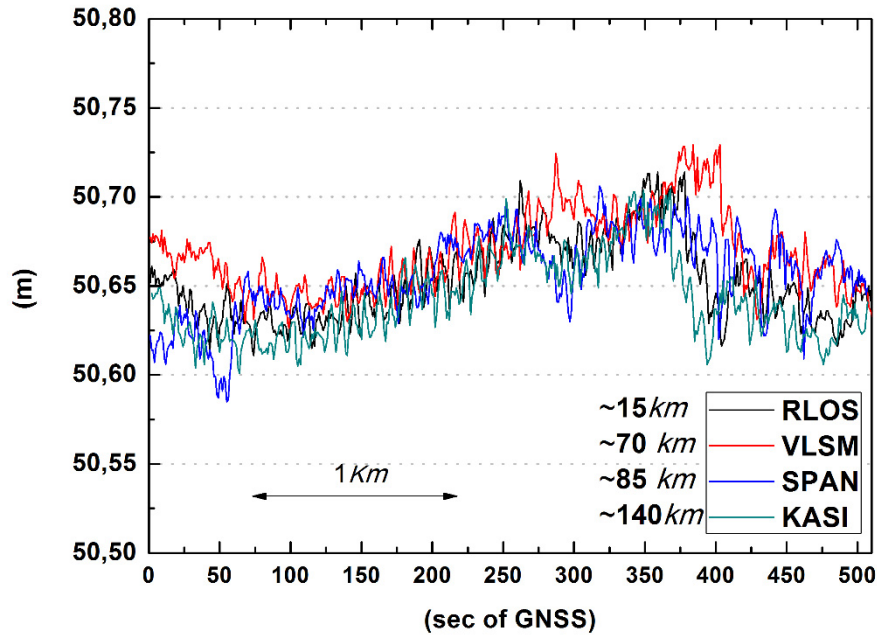

**Figure S2.** Resolves part of the route from different base stations. The section mentioned here concerns the commencement of the route at the Patraikos Gulf near the port of Patra (Point (a) in Figure 4). The base stations used and their distances from point (a) are illustrated (see also Figure 4). An indicative length inside the part of the route presented is illustrated.



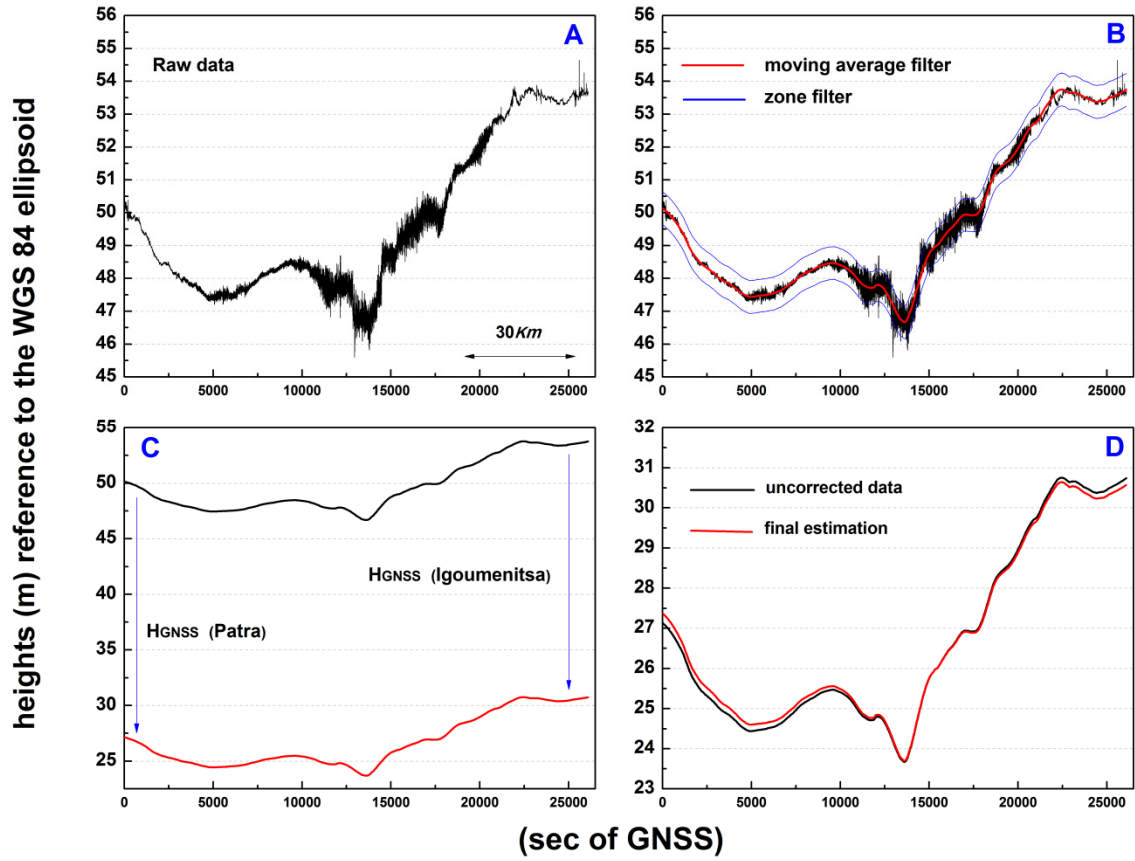

**Figure S3.** Illustration of the Patras - Igoumenitsa route with code ID3 (see Table SM1). (A) It concerns the raw data of the GNSS altitude during the route as they emerged from the PPP solution. (B) It concerns the raw data, the curve of mean values (red curve) obtained by applying the Savitzky-Golay moving average filter and the two curves (light blue) indicating the limiting values imposed by the band filter. (C)  $h_{GNSS}$  receiver elevation correction at port check points described in section 3.2. (D) Linear correction based on deviations of measured port levels from the medium marine level (linear tidal correction described in section 3.3).



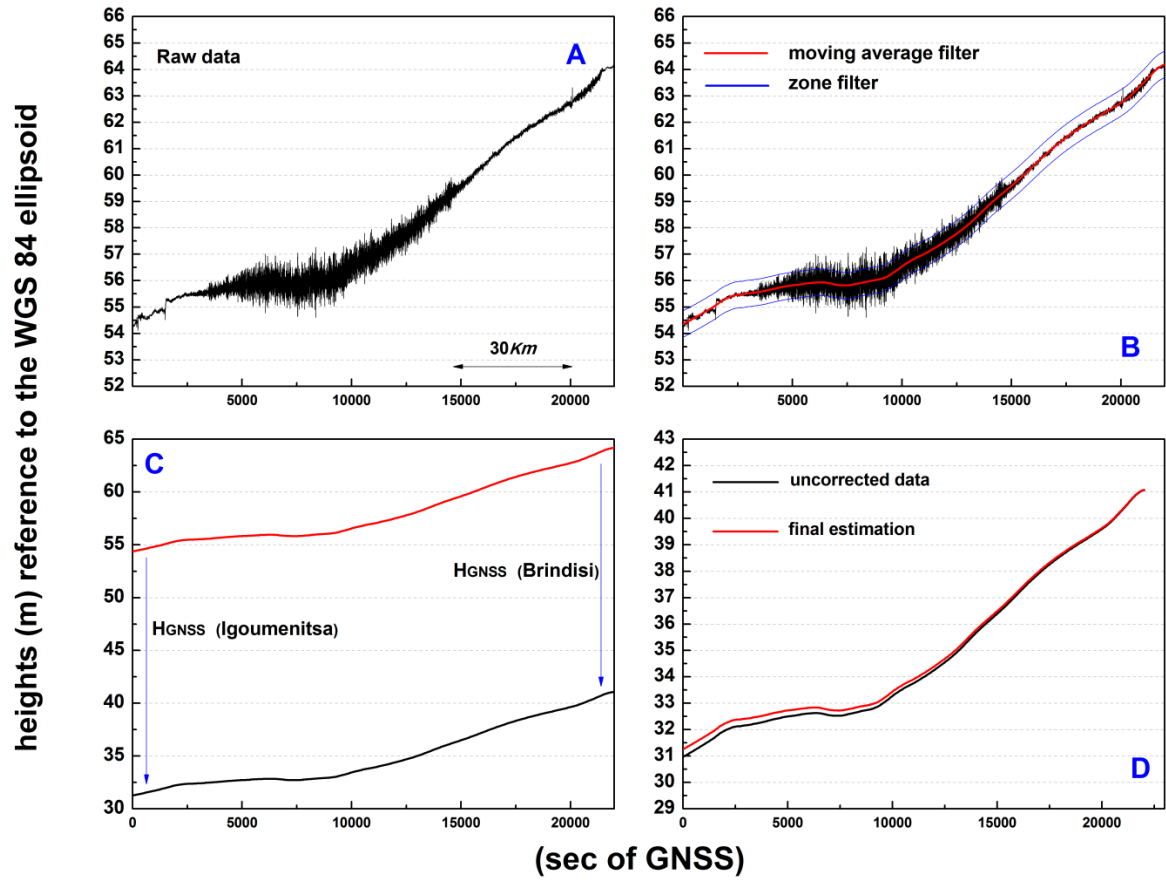

**Figure S4.** Illustration of the Patras - Igoumenitsa route with code ID11 (see Table SM1). (A) It concerns the raw data of the GNSS altitude during the route as they emerged from the PPP solution. (B) It concerns the raw data, the curve of mean values (red curve) obtained by applying the Savitzky-Golay moving average filter and the two curves (light blue) indicating the limiting values imposed by the band filter. (C)  $h_{GNSS}$  receiver elevation correction at port check points described in section 3.2. (D) Linear correction based on deviations of measured port levels from the medium marine level (linear tidal correction described in section 3.3).



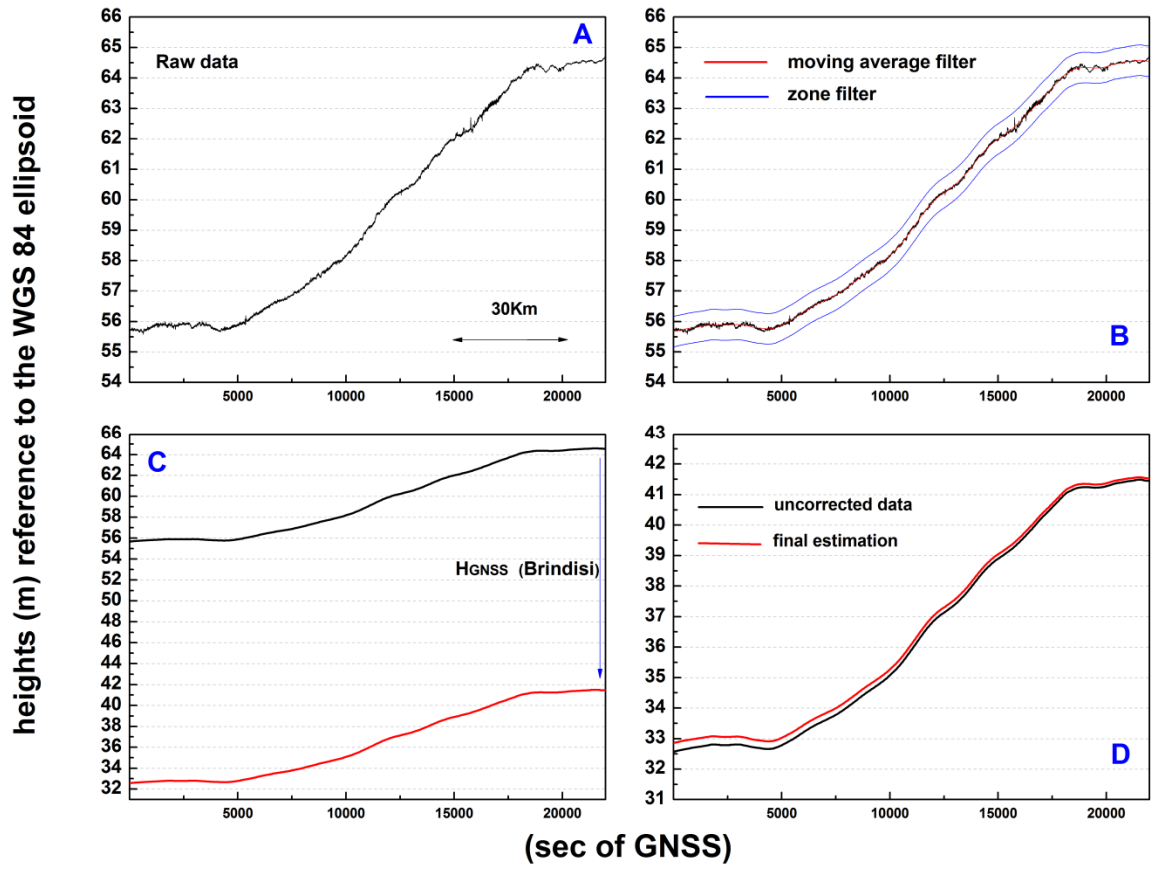

**Figure S5.** Illustration of the Patras - Igoumenitsa route with code ID141 (see Table SM1 ). (A) It concerns the raw data of the GNSS altitude during the route as they emerged from the PPP solution. (B) It concerns the raw data, the curve of mean values (red curve) obtained by applying the Savitzky-Golay moving average filter and the two curves (light blue) indicating the limiting values imposed by the band filter. (C)  $h_{GNSS}$  receiver elevation correction at port check points described in section 3.2. (D) Linear correction based on deviations of measured port levels from the medium marine level (linear tidal correction described in section 3.3).
